# Supplementary material
Source: publisher figshare collection journal article supplement (https://tandf.figshare.com/articles/dataset/_/7611194)
Supplement: Supplementary file 1 [file 1]

**Table 1S. Predefined data extraction form**

We herein present our predefined data extraction form.

n/a=not applicable; PRO=Patient-reported outcome; VAS=Visual analog scale

|                                                                                                                                                                          |  |
|--------------------------------------------------------------------------------------------------------------------------------------------------------------------------|--|
| <b>Type of PRO</b><br><i>(questionnaire, health diary)</i>                                                                                                               |  |
| <b>Mode of administration of the PRO</b><br><i>(self-administered, interviewer-administered–face-to-face, interviewer-administered–telephone, computer-administered)</i> |  |
| <b>Name of the PRO</b>                                                                                                                                                   |  |
| If applicable, <b>original PRO name</b>                                                                                                                                  |  |
| If applicable, <b>original PRO reference</b>                                                                                                                             |  |

*For questionnaires only*

| # | Item | Reference period | Adherence stage assessed |
|---|------|------------------|--------------------------|
|   |      |                  |                          |

*For health diaries only*

| Recorded events | Recording frequency | Recoding period | Adherence stage assessed |
|-----------------|---------------------|-----------------|--------------------------|
|                 |                     |                 |                          |

*For questionnaires and health diaries*

|                                                                                                   |  |
|---------------------------------------------------------------------------------------------------|--|
| <b>Question type</b><br><i>(opened-ended, closed-ended)</i>                                       |  |
| <b>Response options</b><br><i>(event log, checklist, VAS, Likert scale, rating scale, or n/a)</i> |  |
| <b>Overall score, calculation</b>                                                                 |  |
| Overall score, <b>range</b>                                                                       |  |
| Overall score, <b>interpretation</b>                                                              |  |
