# Supplementary material
Source: publisher figshare collection journal article supplement (https://tandf.figshare.com/articles/dataset/_/7611194)
Supplement: Supplementary file 3 [file 1]

Archive with 3 entries (3 files):
- LJAS-2018-0167_SupplementaryMaterial_Table1S_v2018-10-29.pdf
- LJAS-2018-0167_SupplementaryMaterial_Table2S_v2018-11-05_clean.pdf
- LJAS-2018-0167_SupplementaryMaterial_Table3S.pdf
