# Supplementary material
Source: publisher figshare collection journal article supplement (https://tandf.figshare.com/articles/dataset/_/7611194)
Supplement: Supplementary file 3 [file 1 › LJAS-2018-0167_SupplementaryMaterial_Table2S_v2018-11-05_clean.pdf]

Supplementary material

Table 2S.

We herein present the 87 PROs used for measurement of adherence to asthma inhaled maintenance medication. Each of these PROs were used in  $\geq 1$  of the 186 included studies. Even though these instruments were reported to measure adherence, we present them according to the adherence stage(s) that they were found to assess, based on the *ABC Taxonomy for Medication Adherence* [1, 2]. For each instrument, we show the number of items, the types of question, the types of response options, and the number of studies that used the instrument. We also summarize the level of evidence in regards to the measurement properties of the few PROs (n=13/87) that have been validated in patients with asthma (additional information about the measurement properties of these PROS is available elsewhere [3]).

Due to copyright, we could not reprint the items, as well as detailed response options. Nonetheless, this information can be found in the article cited in reference.

Please note that the number of items may not equal the number of questions (e.g. an instrument that comprises questions 1a, 1b, and 2 has two questions, but three items).

| PRO [reference]                                                                                                            | Items,<br>n    | Type of questions:<br>response options | Study that used<br>the PRO, n (%) <sup>a</sup> | Measurement properties evaluated in patients with<br>asthma <sup>b</sup> |
|----------------------------------------------------------------------------------------------------------------------------|----------------|----------------------------------------|------------------------------------------------|--------------------------------------------------------------------------|
| <b>PROs that could be used for measurement of initiation of inhaled maintenance medication (n=1/87)</b>                    |                |                                        |                                                |                                                                          |
| 1. Ad hoc questionnaire #1 [4]                                                                                             | 2              | Closed-ended: checklist                | 1 (0.5%)                                       | —                                                                        |
| <b>PROs that could be used for measurement of initiation and implementation of inhaled maintenance medication (n=2/87)</b> |                |                                        |                                                |                                                                          |
| 2. Ad hoc questionnaire #2 [5]                                                                                             | 2 <sup>c</sup> | Closed-ended: checklist                | 1 (0.5%)                                       | —                                                                        |
| 3. Ad hoc questionnaire #3 [6]                                                                                             | 1              | Closed-ended: checklist                | 1 (0.5%)                                       | —                                                                        |
| <b>PROs that could be used for measurement of implementation of inhaled maintenance medication (n=74/87)</b>               |                |                                        |                                                |                                                                          |

| PRO [reference]                                                              | Items, n        | Type of questions: response options                | Study that used the PRO, n (%) <sup>a</sup> | Measurement properties evaluated in patients with asthma <sup>b</sup>                                                                            |
|------------------------------------------------------------------------------|-----------------|----------------------------------------------------|---------------------------------------------|--------------------------------------------------------------------------------------------------------------------------------------------------|
| 4. <i>Adult Asthma Adherence Questionnaire</i> (AAAQ) [7]                    | 5 <sup>d</sup>  | Closed-ended: Likert Scale                         | 1 (0.5%)                                    | Unknown evidence of construct validity, due to study poor methodological quality [3]                                                             |
| 5. <i>Asthma Adherence Instrument</i> (AAI) [8]                              | 4               | Closed-ended: Likert Scale                         | 1 (0.5%)                                    | —                                                                                                                                                |
| 6. <i>Asthma Diary</i> [9, 10]                                               | 2               | Open-ended (event log)                             | 1 (0.5%)                                    | Limited negative evidence of criterion validity [3]                                                                                              |
| 7. <i>Brief Medication Questionnaire</i> (BMQ) [11]                          | 13 <sup>e</sup> | Open- and closed-ended: checklist and Likert scale | 3 (1.6%)                                    | —                                                                                                                                                |
| 8. <i>Medical Outcome Study (MOS) General Adherence Items</i> [12]           | 5               | Closed-ended: rating scale                         | 4 (2.0%)                                    | —                                                                                                                                                |
| 9. <i>Medication Adherence Reasons Scale</i> (MAR-Scale) [13, 14]            | 20 <sup>f</sup> | Closed-ended: checklist                            | 2 (1.0%)                                    | Limited positive evidence of internal consistency Unknown evidence of structural validity, due to study poor methodological quality [3]          |
| 10. <i>Medication Adherence Report Scale</i> , 9 items (MARS-9) [15]         | 9               | Closed-ended: Likert Scale                         | 7 (3.8%)                                    | —                                                                                                                                                |
| 11. Adapted from the MARS [15]: 5-item MARS (MARS-5) [16] <sup>g</sup>       | 5               | Closed-ended: Likert Scale                         | 2 (1.0%)                                    | —                                                                                                                                                |
| 12. Adapted from the MARS [15]: 4-item MARS (MARS-4) <sup>g</sup>            | 4               | Closed-ended: Likert Scale                         | 4 (2.0%)                                    | —                                                                                                                                                |
| 13. Adapted from the MARS [15]: 10-item MARS for Asthma (MARS-A-10) [17, 18] | 10              | Closed-ended: Likert Scale                         | 21 (11.2%)                                  | Limited positive evidence of internal consistency and structural validity<br>Limited negative evidence of reliability and criterion validity [3] |
| 14. <i>Self-Reported Medication-Taking Scale</i> (SRMTS) [19]                | 4               | Closed-ended: checklist                            | 41 (22.0%)                                  | —                                                                                                                                                |
| 15. Adapted from the SRMTS [19]: Inhaler Adherence Scale (IAS) [20, 21]      | 4               | Closed-ended: checklist [21] or rating scale [20]  | 8 (4.3%)                                    | Unknown evidence of hypotheses testing [3]                                                                                                       |
| 16. Adapted from the SRMTS [19]: Medication Adherence Rating Scale [22]      | 10              | Closed-ended: checklist                            | 3 (1.6%)                                    | —                                                                                                                                                |
| 17. Adapted from the SRMTS [19]: Medication Adherence Scale (MAS) [21]       | 4               | Closed-ended: checklist                            | 6 (3.2%)                                    | Unknown evidence of hypotheses testing [3]                                                                                                       |

| PRO [reference] |                                                                                | Items,<br>n | Type of questions:<br>response options   | Study that used<br>the PRO, n (%) <sup>a</sup> | Measurement properties evaluated in patients with<br>asthma <sup>b</sup>                                                                |
|-----------------|--------------------------------------------------------------------------------|-------------|------------------------------------------|------------------------------------------------|-----------------------------------------------------------------------------------------------------------------------------------------|
| 18.             | Adapted from the MAS [21]: Ad hoc questionnaire #4 [23]                        | 6           | Open- and closed-ended: checklist        | 1 (0.5%)                                       | —                                                                                                                                       |
| 19.             | Adapted from the SRMTS [19]: Reported Adherence to Medication (RAM) Scale [24] | 4           | Closed-ended: Likert scale               | 2 (1.0%)                                       | —                                                                                                                                       |
| 20.             | Adapted from the SRMTS [19]: Ad hoc questionnaire #5 [25]                      | 1           | Closed-ended: checklist                  | 1 (0.5%)                                       | —                                                                                                                                       |
| 21.             | Adapted from the SRMTS [19]: Ad hoc questionnaire #6 [25]                      | 1           | Closed-ended: checklist                  | 1 (0.5%)                                       | —                                                                                                                                       |
| 22.             | Adapted from the SRMTS [19]: Ad hoc questionnaire #7 [25]                      | 1           | Closed-ended: checklist                  | 1 (0.5%)                                       | —                                                                                                                                       |
| 23.             | Adapted from the SRMTS [19]: Ad hoc questionnaire #8 [26]                      | 1           | Closed-ended: checklist                  | 1 (0.5%)                                       | —                                                                                                                                       |
| 24.             | Adapted from the SRMTS [19]: Ad hoc questionnaire #9 [27]                      | 6           | Closed-ended: rating scale               | 1 (0.5%)                                       | —                                                                                                                                       |
| 25.             | Adapted from the SRMTS [19]: Ad hoc questionnaire #10 [28]                     | 4           | Closed-ended: checklist                  | 1 (0.5%)                                       | —                                                                                                                                       |
| 26.             | Adapted from the SRMTS [19]: Ad hoc questionnaire #11 [29]                     | 4           | Closed-ended: Likert scale               | 1 (0.5%)                                       | —                                                                                                                                       |
| 27.             | <i>Morisky Medication Adherence Scale</i> , 8 items (MMAS-8) [30]              | 8           | Closed-ended: checklist and Likert scale | 24 (12.9%)                                     | The Slovenian version of the MMAS-8 has recently been validated in asthma patients $\geq 12$ years by Janežič <i>et al.</i> (2017) [31] |
| 28.             | Adapted from the MMAS-8 [30]: Ad hoc questionnaire #12 [32]                    | 4           | Closed-ended: checklist                  | 1 (0.5%)                                       | —                                                                                                                                       |
| 29.             | Medication Intake Survey-Asthma (MIS-A) [33]                                   | 9           | Open- and closed-ended: checklist        | 1 (0.5%)                                       | Limited negative evidence of hypotheses testing                                                                                         |
| 30.             | <i>Newly Developed Adherence Questionnaire</i> [34]                            | 8           | Closed-ended: Likert scale               | 1 (0.5%)                                       | —                                                                                                                                       |
| 31.             | <i>Patterns of Asthma Medication Use Questionnaire</i> [35]                    | 5           | Closed-ended: checklist                  | 1 (0.5%)                                       | Evidence not rated owing to insufficient data on the quality of the measurement properties assessed [3]                                 |
| 32.             | <i>Patient Medication Adherence Questionnaire</i> (PMAQ) [36]                  | 5           | Open- and closed-ended: checklist        | 1 (0.5%)                                       | —                                                                                                                                       |

| PRO [reference]                                                                                            | Items,<br>n    | Type of questions:<br>response options   | Study that used<br>the PRO, n (%) <sup>a</sup> | Measurement properties evaluated in patients with<br>asthma <sup>b</sup>                                                                       |
|------------------------------------------------------------------------------------------------------------|----------------|------------------------------------------|------------------------------------------------|------------------------------------------------------------------------------------------------------------------------------------------------|
| 33. Adapted from the <i>Revised Asthma Problem Behavior Checklist</i> (RAPBC) [37]                         | 6              | Closed-ended: Likert scale               | 1 (0.5%)                                       | —                                                                                                                                              |
| 34. Adapted from the <i>Simplified Medication Adherence Questionnaire</i> (SMAQ): Ad hoc questionnaire #13 | 6              | Closed-ended: checklist                  | 1 (0.5%)                                       | —                                                                                                                                              |
| 35. <i>Test d'évaluation de l'observance</i> [38]                                                          | 6              | Closed-ended: checklist                  | 2 (1.0%)                                       | —                                                                                                                                              |
| 36. <i>Test of Adherence to Inhalers</i> (TAI), patient domain [39]                                        | 10             | Closed-ended: Likert scale               | 3 (1.6%)                                       | Limited positive evidence of internal consistency, reliability, and structural validity<br>Limited negative evidence of criterion validity [3] |
| 37. <i>Tool for Adherence Behaviour Screening</i> (TABS) [40]                                              | 8              | Closed-ended: Likert scale               | 1 (0.5%)                                       | —                                                                                                                                              |
| 38. Unnamed questionnaire [41]                                                                             | 1              | Closed-ended: checklist                  | 1 (0.5%)                                       | Evidence not rated owing to insufficient data on the quality of the measurement properties assessed [3]                                        |
| 39. Ad hoc questionnaire #14 [42]                                                                          | 1              | Closed-ended: Likert scale               | 2 (1.0%)                                       | —                                                                                                                                              |
| 40. Ad hoc questionnaire #15 [43]                                                                          | 4              | Open-ended                               | 1 (0.5%)                                       | —                                                                                                                                              |
| 41. Ad hoc questionnaire #16 [44]                                                                          | 2              | Closed-ended: checklist                  | 1 (0.5%)                                       | —                                                                                                                                              |
| 42. Ad hoc questionnaire #17 [45]                                                                          | 1              | Closed-ended: VAS                        | 1 (0.5%)                                       | —                                                                                                                                              |
| 43. Ad hoc questionnaire #18 [46]                                                                          | 1              | Closed-ended: checklist                  | 1 (0.5%)                                       | —                                                                                                                                              |
| 44. Ad hoc questionnaire #19 [47]                                                                          | 3 <sup>h</sup> | Closed-ended: checklist and rating scale | 1 (0.5%)                                       | —                                                                                                                                              |
| 45. Ad hoc questionnaire #20 [48]                                                                          | 2              | Open-ended                               | 1 (0.5%)                                       | —                                                                                                                                              |
| 46. Ad hoc questionnaire #21 [49]                                                                          | 1              | Closed-ended: checklist                  | 1 (0.5%)                                       | —                                                                                                                                              |
| 47. Ad hoc questionnaire #22 [50]                                                                          | 1              | Closed-ended: Likert scale               | 1 (0.5%)                                       | —                                                                                                                                              |
| 48. Ad hoc questionnaire #23 [51]                                                                          | 2              | Open-ended                               | 1 (0.5%)                                       | —                                                                                                                                              |
| 49. Ad hoc questionnaire #24 [52]                                                                          | 2              | Closed-ended: checklist                  | 1 (0.5%)                                       | —                                                                                                                                              |
| 50. Ad hoc questionnaire #25 [53]                                                                          | 1              | Closed-ended: Likert scale               | 1 (0.5%)                                       | —                                                                                                                                              |
| 51. Ad hoc questionnaire #26 [54]                                                                          | 1              | Open-ended                               | 1 (0.5%)                                       | —                                                                                                                                              |
| 52. Ad hoc questionnaire #27 [55]                                                                          | 2              | Closed-ended: checklist                  | 1 (0.5%)                                       | —                                                                                                                                              |
| 53. Ad hoc questionnaire #28 [56]                                                                          | 1              | Open-ended                               | 1 (0.5%)                                       | —                                                                                                                                              |
| 54. Ad hoc questionnaire #29 [57]                                                                          | 1              | Closed-ended: checklist                  | 1 (0.5%)                                       | —                                                                                                                                              |
| 55. Ad hoc questionnaire #30 [58]                                                                          | 2              | Open- and closed-ended: checklist        | 1 (0.5%)                                       | —                                                                                                                                              |

| PRO [reference]                                                                                | Items,<br>n    | Type of questions:<br>response options      | Study that used<br>the PRO, n (%) <sup>a</sup> | Measurement properties evaluated in patients with<br>asthma <sup>b</sup> |
|------------------------------------------------------------------------------------------------|----------------|---------------------------------------------|------------------------------------------------|--------------------------------------------------------------------------|
| 56. Ad hoc questionnaire #31 [59]                                                              | 5 <sup>1</sup> | Open- and closed-ended:<br>checklist        | 1 (0.5%)                                       | —                                                                        |
| 57. Ad hoc questionnaire #32 [60]                                                              | 1              | Closed-ended: checklist                     | 1 (0.5%)                                       | —                                                                        |
| 58. Ad hoc questionnaire #33 [61]                                                              | 2              | Closed-ended: checklist and<br>Likert scale | 1 (0.5%)                                       | —                                                                        |
| 59. Ad hoc questionnaire #34 [62]                                                              | 1              | Closed-ended: checklist                     | 1 (0.5%)                                       | —                                                                        |
| 60. Ad hoc questionnaire #35 [63]                                                              | 1              | Closed-ended: checklist                     | 1 (0.5%)                                       | —                                                                        |
| 61. Ad hoc questionnaire #36 [64]                                                              | 10             | Open- and closed-ended:<br>checklist        | 1 (0.5%)                                       | —                                                                        |
| 62. Ad hoc questionnaire #37 [65]                                                              | 1              | Closed-ended: checklist                     | 1 (0.5%)                                       | —                                                                        |
| 63. Ad hoc questionnaire #38 [32]                                                              | 1              | Closed-ended: VAS                           | 1 (0.5%)                                       | —                                                                        |
| 64. Ad hoc questionnaire #39 [66]                                                              | 1              | Open- and closed-ended:<br>checklist        | 1 (0.5%)                                       | —                                                                        |
| 65. Ad hoc questionnaire #40 [67]                                                              | 1              | Closed-ended: checklist                     | 1 (0.5%)                                       | —                                                                        |
| 66. Ad hoc questionnaire #41 [68]                                                              | 1              | Closed-ended: checklist                     | 1 (0.5%)                                       | —                                                                        |
| 67. Ad hoc questionnaire #42 [68, 69]                                                          | 1              | Closed-ended: Likert scale                  | 1 (0.5%)                                       | —                                                                        |
| 68. Ad hoc questionnaire #43 [70]                                                              | 1              | Open-ended                                  | 1 (0.5%)                                       | —                                                                        |
| 69. Ad hoc questionnaire #44 [66, 71]                                                          | 1              | Open- and closed-ended:<br>checklist        | 1 (0.5%)                                       | —                                                                        |
| 70. Ad hoc questionnaire #45 [72]                                                              | 1              | Closed-ended: checklist                     | 1 (0.5%)                                       | —                                                                        |
| 71. Modified Ad hoc questionnaire #46 [73]                                                     | 1              | Closed-ended: checklist                     | 1 (0.5%)                                       | —                                                                        |
| 72. Ad hoc questionnaire #47: <i>Cost-Related Non-Adherence</i> [74]                           | 3              | Closed-ended: checklist                     | 1 (0.5%)                                       | —                                                                        |
| 73. Ad hoc questionnaire #48: <i>European Community Respiratory Health Survey</i> (ECRHS) [75] | 2              | Closed-ended: checklist                     | 3 (1.6%)                                       | —                                                                        |
| 74. Ad hoc questionnaire #49: <i>Global Asthma Physician and Patient</i> (GAPP) Survey [76]    | 1              | Closed-ended: checklist                     | 1 (0.5%)                                       | —                                                                        |
| 75. Ad hoc questionnaire #50: <i>Questionnaire Low Adherence</i> [7]                           | 2              | Open-ended                                  | 1 (0.5%)                                       | —                                                                        |
| 76. Ad hoc health diary #51 [77]                                                               | 4              | Open-ended (event log)                      | 1 (0.5%)                                       | —                                                                        |
| 77. Ad hoc health diary #52 [78]                                                               | 5              | Open-ended (event log)                      | 1 (0.5%)                                       | —                                                                        |

| PRO [reference]                                                                                                                                                      | Items,<br>n     | Type of questions:<br>response options | Study that used<br>the PRO, n (%) <sup>a</sup> | Measurement properties evaluated in patients with<br>asthma <sup>b</sup>                                |
|----------------------------------------------------------------------------------------------------------------------------------------------------------------------|-----------------|----------------------------------------|------------------------------------------------|---------------------------------------------------------------------------------------------------------|
| <b>PROs that could be used for measurement of implementation and persistence with inhaled maintenance medication (n=7/87)</b>                                        |                 |                                        |                                                |                                                                                                         |
| 78. <i>Asthma Starts with Knowledge</i> , 12 items (ASK-12) [79]                                                                                                     | 12              | Closed-ended: Likert scale             | 2 (1.0%)                                       | ASK-20 (longer version): unknown evidence of hypotheses testing [3]                                     |
| 79. <i>Questions of interest</i> (QIs) [80]                                                                                                                          | 4               | Open-ended                             | 1 (0.5%)                                       | Evidence not rated owing to insufficient data on the quality of the measurement properties assessed [3] |
| 80. Adapted from the SRMTS [19]: Ad hoc questionnaire #53 [81]                                                                                                       | 4               | Unclear                                | 2 (1.0%)                                       | —                                                                                                       |
| 81. Ad hoc questionnaire #54 [82]                                                                                                                                    | 1               | Closed-ended: checklist                | 1 (0.5%)                                       | —                                                                                                       |
| 82. Ad hoc questionnaire #55 [83]                                                                                                                                    | 4               | Open- and closed-ended: checklist      | 1 (0.5%)                                       | —                                                                                                       |
| 83. Ad hoc questionnaire #56 [84]                                                                                                                                    | 2               | Closed-ended: checklist                | 1 (0.5%)                                       | —                                                                                                       |
| 84. Ad hoc questionnaire #57 [85]                                                                                                                                    | 3               | Closed-ended: checklist                | 1 (0.5%)                                       | —                                                                                                       |
| <b>PROs that could not be used for measurement of any adherence stage (n=3/87)</b>                                                                                   |                 |                                        |                                                |                                                                                                         |
| 85. <i>Adherence Estimator</i> ® [86]                                                                                                                                | 3 <sup>j</sup>  | Closed-ended: Likert scale             | 1 (0.5%)                                       | N/A: was not found to measure any adherence stages                                                      |
| 86. <i>Beliefs about Medicines Questionnaire</i> [24]                                                                                                                | 18 <sup>k</sup> | Closed-ended: Likert scale             | 1 (0.5%)                                       | N/A: was not found to measure any adherence stages                                                      |
| 87. Ad hoc questionnaire #58 [87]                                                                                                                                    | 3 <sup>l</sup>  | Open-ended                             | 1 (0.5%)                                       | N/A: was not found to measure any adherence stages                                                      |
| ICS: Inhaled corticosteroids; MARS: Medication Adherence Report Scale, 9 items; MAS=Medication Adherence Scale; PRO=Patient-reported outcome instrument; SRMTS=Self- |                 |                                        |                                                |                                                                                                         |

Reported Medication-Taking Scale; VAS: Visual analog scale.

<sup>a</sup> Percentages exceed 100%, because there was sometimes more than one PRO used within a single study.

<sup>b</sup> We herein report measurement properties for which evidence was judged as positive, negative, or unknown. More details presented elsewhere [3].

<sup>c</sup> The second and last item measures barriers to adherence.

<sup>d</sup> The last four items measure barriers to adherence.

<sup>e</sup> The last nine items measure barriers to adherence.

<sup>f</sup> The last nineteen items measure barriers to adherence.

<sup>g</sup> Chapman *et al.* (2017) the five items in their online supplementary material.

<sup>h</sup> The third and last item measures satisfaction with medications.

<sup>i</sup> The last three items were not used to measure adherence.

<sup>j</sup> The PRO measures barriers to adherence.

<sup>k</sup> The PRO measures beliefs about medicines.

<sup>l</sup> The PRO measures medication use.

### References cited in Table 2S

1. Vrijens B, Dima AL, Van Ganse E, van Boven JF, Eakin MN, Foster JM, *et al.* What we mean when we talk about adherence in respiratory medicine. J Allergy Clin Immunol Pract. 2016;4:802-812.

2. Vrijens B, De Geest S, Hughes DA, Przemyslaw K, Demonceau J, Ruppar T, *et al.* A new taxonomy for describing and defining adherence to medications. *Br J Clin Pharmacol.* 2012;73:691-705.
3. Gagne M, Boulet LP, Perez N, Moisan J. Patient-reported outcome instruments that evaluate adherence behaviours in adults with asthma: a systematic review of measurement properties. *Br J Clin Pharmacol.* 2018;84:1928-1940.
4. Thomas EJ, Burstin HR, O'Neil AC, Orav EJ, Brennan TA. Patient noncompliance with medical advice after the emergency department visit. *Ann Emerg Med.* 1996;27:49-55.
5. Kennedy J, Tuleu I, Mackay K. Unfilled prescriptions of medicare beneficiaries: Prevalence, reasons, and types of medicines prescribed. *J Manag Care Pharm.* 2008;14:553-560.
6. Esposito D, Schone E, Williams T, Liu S, CyBulski K, Stapulonis R, *et al.* Prevalence of unclaimed prescriptions at military pharmacies. *J Manag Care Pharm.* 2008;14:541-552.
7. Schatz M, Zeiger RS, Yang SJ, Weinstein AG, Chen W, Saris-Baglama RN, *et al.* Development and Preliminary Validation of the Adult Asthma Adherence Questionnaire <sup>TM</sup>. *J Allergy Clin Immunol Pract.* 2013;1:280-288.
8. Putman HP. Knowledge, health beliefs, attitude, and behavioral intention as predictors of compliance with prescribed treatment regimens in rural Appalachian adults diagnosed with asthma. US: Widener University; 2002.
9. Creer TL, Kotses H, Reynolds RV. Living with asthma: Part II. Beyond CARIH. *J Asthma.* 1989;26:31-52.
10. Berg J, Dunbar-Jacob J, Rohay JM. Compliance with inhaled medications: The relationship between diary and electronic monitor. *Ann Behav Med.* 1998;20:36-38.
11. Svarstad BL, Chewning BA, Sleath BL, Claesson C. The Brief Medication Questionnaire: a tool for screening patient adherence and barriers to adherence. *Patient Educ Couns.* 1999;37:113-124.
12. Kravitz RL, Hays RD, Sherbourne CD, DiMatteo MR, Rogers WH, Ordway L, *et al.* Recall of recommendations and adherence to advice among patients with chronic medical conditions. *Arch Intern Med.* 1993;153:1869-1878.
13. Unni EJ, Farris KB. Development of a new scale to measure self-reported medication nonadherence. *Res Social Adm Pharm.* 2015;11:e133-143.

14. Unni EJ, Olson JL, Farris KB. Revision and validation of Medication Adherence Reasons Scale (MAR-Scale). *Curr Med Res Opin.* 2014;30:211-221.
15. Horne R, Weinman J. Self-regulation and self-management in asthma: Exploring the role of illness perceptions and treatment beliefs in explaining non-adherence to preventer medication. *Psychology and Health.* 2002;17:17-32.
16. Horne R, Hankin M. The Medication Adherence Report Scale. Brighton, UK: University of Brighton; c2004.
17. Cohen JL, Mann DM, Wisnivesky JP, Horne R, Leventhal H, Musumeci-Szabó TJ, *et al.* Assessing the validity of self-reported medication adherence among inner-city asthmatic adults: the Medication Adherence Report Scale for Asthma. *Annals of Allergy, Asthma and Immunology.* 2009;103:325-331.
18. Mora PA, Berkowitz A, Contrada RJ, Wisnivesky J, Horne R, Leventhal H, *et al.* Factor structure and longitudinal invariance of the Medical Adherence Report Scale-Asthma. *Psychol Health.* 2011;26:713-727.
19. Morisky DE, Green LW, Levine DM. Concurrent and predictive validity of a self-reported measure of medication adherence. *Med Care.* 1986;24:67-74.
20. Erickson SR, Coombs JH, Kirking DM, Azimi AR. Compliance from self-reported versus pharmacy claims data with metered-dose inhalers. *Ann Pharmacother.* 2001;35:997-1003.
21. Brooks CM, Richards JM, Kohler CL, Soong SJ, Martin B, Windsor RA, *et al.* Assessing adherence to asthma medication and inhaler regimens: a psychometric analysis of adult self-report scales. *Med Care.* 1994;32:298-307.
22. Fialko L, Garety PA, Kuipers E, Dunn G, Bebbington PE, Fowler D, *et al.* A large-scale validation study of the Medication Adherence Rating Scale (MARS). *Schizophr Res.* 2008;100:53-59.
23. Odedina FT, Leader AG, Venkataraman K, Cole R, Storm A. Feasibility of a Community Asthma Management Network (CAMN) program: Lessons learnt from an exploratory investigation. *J Soc Adm Pharm.* 2000;17:15-21.
24. Horne R, Weinman J, Hankins M. The Beliefs about Medicines Questionnaire: the development and evaluation of a new method for assessing the cognitive representation of medication. *Psychol Health.* 1999;14:1-24.
25. Gadkari AS, McHorney CA. Unintentional non-adherence to chronic prescription medications: How unintentional is it really? *BMC Health Serv Res.* 2012;12:98.

26. Taegtmeyer AB, Steurer-Stey C, Price DB, Wildhaber JH, Spertini F, Leuppi JD. Predictors of asthma control in everyday clinical practice in Switzerland. *Curr Med Res Opin.* 2009;25:2549-2555.
27. Cooke L, Myers LB, Derakshan N. Lung function, adherence and denial in asthma patients who exhibit a repressive coping style. *Psychol Health Med.* 2003;8:35-44.
28. Aggarwal AN, Kumari R, Grover S. Patient Satisfaction With Inhaled Medication for Asthma. *Respir Care.* 2018;63:859-864.
29. Unni E, Shiyanbola OO. Clustering medication adherence behavior based on beliefs in medicines and illness perceptions in patients taking asthma maintenance medications. *Curr Med Res Opin.* 2016;32:113-121.
30. Morisky DE, Ang A, Krousel-Wood M, Ward HJ. Predictive validity of a medication adherence measure in an outpatient setting. *J Clin Hypertens (Greenwich).* 2008;10:348-354.
31. Janežič A, Locatelli I, Kos M. Criterion validity of 8-item Morisky Medication Adherence Scale in patients with asthma. *PLoS One.* 2017;12.
32. Bozek A, Jarzab J. Adherence to asthma therapy in elderly patients. *J Asthma.* 2010;47:162-165.
33. Dima AL, van Ganse E, Laforest L, Texier N, de Bruin M, The Astro-Lab Group. Measuring medication adherence in asthma: Development of a novel self-report tool. *Psychol Health.* 2017;32:1288-1307.
34. Axelsson M, Ekerljung L, Lundback B, Lotvall J. Personality and unachieved treatment goals related to poor adherence to asthma medication in a newly developed adherence questionnaire: A population-based study. *Multidiscip Respir Med.* 2016;11:42.
35. Greaves CJ, Hyland ME, Halpin DMG, Blake S, Seamark D. Patterns of corticosteroid medication use: Non-adherence can be effective in milder asthma. *Prim Care Respir J.* 2005;14:99-105.
36. Duong M, Piroth L, Grappin M, Forte F, Peytavin G, Buisson M, *et al.* Evaluation of the Patient Medication Adherence Questionnaire as a tool for self-reported adherence assessment in HIV-infected patients on antiretroviral regimens. *HIV Clin Trials.* 2001;2:128-135.
37. Creer TL, Wigal JK, Tobin DL, Kotses H, Snyder SE, Winder JA. The Revised Asthma Problem Behavior Checklist. *J Asthma.* 1989;26:17-29.
38. Girerd X, Hanon O, Anagnostopoulos K, Ciupek C, Mourad JJ, Consoli S. [Assessment of antihypertensive compliance using a self-administered questionnaire: development and use in a hypertension clinic]. *Presse Med.* 2001;30:1044-1048.

39. Plaza V, Fernandez-Rodriguez C, Melero C, Cosio BG, Entrenas LM, de Llano LP, *et al.* Validation of the 'Test of the Adherence to Inhalers' (TAI) for Asthma and COPD Patients. *J Aerosol Med Pulm Drug Deliv.* 2016;29:142-152.
40. George J, Mackinnon A, Kong DC, Stewart K. Development and validation of the Beliefs and Behaviour Questionnaire (BBQ). *Patient Educ Couns.* 2006;64:50-60.
41. Patel M, Perrin K, Pritchard A, Williams M, Wijesinghe M, Weatherall M, *et al.* Accuracy of patient self-report as a measure of inhaled asthma medication use. *Respirology.* 2013;18:546-552.
42. Clark NM, Ko YA, Gong ZM, Johnson TR. Outcomes associated with a negotiated asthma treatment plan. *Chron Respir Dis.* 2012;9:175-182.
43. Jobin MS, Moisan J, Bolduc Y, Dorval E, Boulet LP, Grégoire JP. Factors associated with the appropriate use of asthma drugs. *Can Respir J.* 2011;18:97-104.
44. Møldrup C, Stein J, Søndergaard B. "Patients don't lie"; a view on adherence in asthma. *Pharm World Sci.* 2010;32:795-798.
45. Bae YJ, Kim TB, Jee YK, Park HW, Chang YS, Cho SH, *et al.* Severe asthma patients in Korea overestimate their adherence to inhaled corticosteroids. *J Asthma.* 2009;46:591-595.
46. Mehuys E, Van Bortel L, De Bolle L, Van Tongelen I, Annemans L, Remon JP, *et al.* Effectiveness of pharmacist intervention for asthma control improvement. *Eur Respir J.* 2008;31:790-799.
47. Matza LS, Yu-Isenberg KS, Coyne KS, Park J, Wakefield J, Skinner EP, *et al.* Further testing of the reliability and validity of the ASK-20 adherence barrier questionnaire in a medical center outpatient population. *Curr Med Res Opin.* 2008;24:3197-3206.
48. Bergström SE, Boman G, Eriksson L, Formgren H, Foucard T, Hörte LG, *et al.* Asthma mortality among Swedish children and young adults, a 10-year study. *Respir Med.* 2008;102:1335-1341.
49. Hahn SR, Park J, Skinner EP, Yu-Isenberg KS, Weaver MB, Crawford B, *et al.* Development of the ASK-20 adherence barrier survey. *Curr Med Res Opin.* 2008;24:2127-2138.
50. Tamura G, Ohta K. Adherence to treatment by patients with asthma or COPD: Comparison between inhaled drugs and transdermal patch. *Respir Med.* 2007;101:1895-1902.

51. Bender BG, Long A, Parasuraman B, Tran ZV. Factors influencing patient decisions about the use of asthma controller medication. *Ann Allergy Asthma Immunol.* 2007;98:322-328.
52. Ulrik CS, Backer V, Søes-Petersen U, Lange P, Harving H, Plaschke PP. The patient's perspective: Adherence or non-adherence to asthma controller therapy? *J Asthma.* 2006;43:701-704.
53. Halm EA, Mora P, Leventhal H. No symptoms, no asthma: the acute episodic disease belief is associated with poor self-management among inner-city adults with persistent asthma. *Chest.* 2006;129:573-580.
54. Murphy VE, Gibson PG, Talbot PI, Kessel CG, Clifton VL. Asthma self-management skills and the use of asthma education during pregnancy. *Eur Respir J.* 2005;26:435-441.
55. Adams RJ, Appleton S, Wilson DH, Ruffin RE. Participatory decision making, asthma action plans, and use of asthma medication: A population survey. *J Asthma.* 2005;42:673-678.
56. Barber N, Parsons J, Clifford S, Darracott R, Horne R. Patients' problems with new medication for chronic conditions. *Qual Saf Health Care.* 2004;13:172-175.
57. Kuo SH. Implementation of asthma guideline in Taiwan - The management in medical centers. *J Asthma.* 2002;39:767-770.
58. Malhotra S, Jain S, Pandhi P. Drug-related visits to the medical emergency department: A prospective study from India. *Int J Clin Pharmacol Ther.* 2001;39:12-18.
59. Lindberg M, Ekström T, Möller M, Ahlner J. Asthma care and factors affecting medication compliance: The patient's point of view. *Int J Qual Health Care.* 2001;13:375-383.
60. Put C, Van den Bergh O, Demedts M, Verleden G. A study of the relationship among self-reported noncompliance, symptomatology, and psychological variables in patients with asthma. *J Asthma.* 2000;37:503-510.
61. Van Ganse E, Hubloue I, Vincken W, Leufkens HGM, Gregoire J, Ernst P. Actual use of inhaled corticosteroids and risk of hospitalisation: A case-control study. *Eur J Clin Pharmacol.* 1997;51:449-454.
62. Tettersell MJ. Asthma patients' knowledge in relation to compliance with drug therapy. *J Adv Nurs.* 1993;18:103-113.

63. Dompeling E, Van Grunsven PM, Van Schayck CP, Folgering H, Molema J, Van Weel C. Treatment with inhaled steroids in asthma and chronic bronchitis: Long-term compliance and inhaler technique. *Fam Pract.* 1992;9:161-166.
64. Ford FM, Hunter M, Hensley MJ, Gillies A, Carney S, Smith AJ, *et al.* Hypertension and asthma: Psychological aspects. *Soc Sci Med.* 1989;29:79-84.
65. Adouni Lawani M, Zongo F, Breton MC, Moisan J, Grégoire JP, Dorval E, *et al.* Factors associated with adherence to asthma treatment with inhaled corticosteroids: A cross-sectional exploratory study. *Journal of Asthma.* 2018;55:318-329.
66. Elliott RA, Boyd MJ, Salema NE, Davies J, Barber N, Mehta RL, *et al.* Supporting adherence for people starting a new medication for a long-term condition through community pharmacies: A pragmatic randomised controlled trial of the New Medicine Service. *BMJ Quality and Safety.* 2016;25:747-758.
67. Freigofas J, Seidling HM, Quinzler R, Schöttker B, Saum KU, Brenner H, *et al.* Characteristics of medication schedules used by elderly ambulatory patients. *Eur J Clin Pharmacol.* 2015;71:1109-1120.
68. Laforest L, Van Ganse E, Devouassoux G, Chatte G, Tamberou C, Belhassen M, *et al.* [Deliberate interruptions and changes of dose of inhaled corticosteroids by asthma patients: "a community pharmacy study"]. *Rev Mal Respir.* 2015;32:8-17.
69. Lirios CG, Guillen JC, Valdes JH. Limits of two models of occupational health in a study of adherence to asthma treatment in elderly migrant workers. *Vision Gerencial.* 2017;16:103-118.
70. Robijn AL, Jensen ME, Gibson PG, Powell H, Giles WB, Clifton VL, *et al.* Trends in asthma self-management skills and inhaled corticosteroid use during pregnancy and postpartum from 2004 to 2017. *J Asthma.* 2018:1-9.
71. Tsiligianni IG, Papadokostakis P, Prokopiadou D, Stefanaki I, Tsakountakis N, Lionis C. Impact of the financial crisis on adherence to treatment of a rural population in Crete, Greece. *Qual Prim Care.* 2014;22:238-244.
72. Besh O, Besh D, Sorkopud O, Kondratiuk M, Slaba O, Zhakun I, *et al.* ASIT as the component of bronchial asthma's therapy can improve the adherence to the treatment. *Wiad Lek.* 2018;71:849-854.
73. Inui TS, Carter WB, Pecoraro RE. Screening for noncompliance among patients with hypertension: Is self-report the best available measure? *Med Care.* 1981;19:1061-1064.

74. Wilson IB, Schoen C, Neuman P, Strollo MK, Rogers WH, Chang H, *et al.* Physician-patient communication about prescription medication nonadherence: a 50-state study of America's seniors. *J Gen Intern Med.* 2007;22:6-12.
75. Burney PG, Luczynska C, Chinn S, Jarvis D. The European Community Respiratory Health Survey. *Eur Respir J.* 1994;7:954-960.
76. Blaiss MS, Kaliner MA, Baena-Cagnani CE, Dahl R, Valovirta EJ, Canonica GW. Barriers to asthma treatment in the United States: results from the global asthma physician and patient survey. *The World Allergy Organization journal.* 2009;2:303-313.
77. Shaikh WA, Shaikh SW. Allergies in India: A study on medication compliance. *J Indian Med Assoc.* 2009;107:462-463.
78. Allen RM, Jones MP, Oldenburg B. Randomised trial of an asthma self-management programme for adults. *Thorax.* 1995;50:731-738.
79. Takemura M, Nishio M, Fukumitsu K, Takeda N, Ichikawa H, Asano T, *et al.* Optimal cut-off value and clinical usefulness of the Adherence Starts with Knowledge-12 in patients with asthma taking inhaled corticosteroids. *J Thorac Dis.* 2017;9:2350-2359.
80. Walewski KM, Cicutto L, D'Urzo AD, Heslegrave RJ, Chapman KR. Evaluation of a questionnaire to assess compliance with anti-asthma medications. *J Asthma.* 2004;41:77-83.
81. Campos Andreu A, Giner A, Alamar R, Castello JV, Garcia I, Hernandez D, *et al.* Therapeutic compliance of asthmatics in an allergy outpatient clinic (the SEGARIA project). *Rev Esp Alergol Inmunol Clin.* 1996;11:101-105.
82. Douglass JA, Goeman DP, McCarthy EA, Sawyer SM, Aroni RA, Stewart K, *et al.* Over-the-counter beta2-agonist purchase versus script: a cross-sectional study. *Respir Med.* 2012;106:223-229.
83. Tavasoli S, Heidarnazhad H, Kazemnejad A. Factors affecting patients' compliance to metered-dose inhaler drugs in two asthma clinics in Tehran, Iran. *Iran J Allergy Asthma Immunol.* 2006;5:187-193.
84. Singh V, Sinha HV, Gupta R. Barriers in the management of asthma and attitudes towards complementary medicine. *Respir Med.* 2002;96:835-840.
85. Khadraoui M, Cheikh R, Ben Mustapha MA, Zaibi M, Zribi S, Haffani F, *et al.* [Compliance in asthma patients]. *Tunis Med.* 1989;67:625-630.
86. McHorney CA. The Adherence Estimator: A brief, proximal screener for patient propensity to adhere to prescription medications for chronic disease. *Curr Med Res Opin.* 2009;25:215-238.

87. James PNE, Anderson JB, Prior JG, White JP, Henry JA, Cochrane GM. Patterns of drug taking in patients with chronic airflow obstruction. *Postgrad Med J*. 1985;61:7-10.
88. Chapman S, Dale P, Svedsater H, Stynes G, Vyas N, Price D, *et al*. Modelling the effect of beliefs about asthma medication and treatment intrusiveness on adherence and preference for oncedaily vs. twice-daily medication. *npj Primary Care Respiratory Medicine*. 2017;27.
